# Supplementary material for: Development of the Parental Experience with Care for Children with Serious Illnesses (PRECIOUS) quality of care measure
Source: PubMed Central journal article supplement (PMC10921687; doi:10.1186/s12904-024-01401-x), 2024-03-08
Supplement: 12904_2024_1401_MOESM4_ESM.pdf [file 12904_2024_1401_MOESM4_ESM.pdf]

***PaRental Experience with care for Children with serIOUS illnesses (PRECIOUS).***

---

**INSTRUCTIONS**

*Dear parent,*

We are interested in your experience with your child’s healthcare (optional) from [Click or tap here to enter text.] **over the last 12 months**. Sharing your views will help improve the quality-of-care in the future.

While responding to the following statements, think of all the healthcare workers who have managed your child’s illness or worked with your family **in the last 12 months** (optional) at [Click or tap here to enter text.].

Healthcare workers refer to a broad range of workers that your child has seen for his/her illness(es) and/or that you have interacted with due to your child’s illness. These can include doctors, nurses, therapists, and other healthcare workers.

For each of the following statements, please choose the response option that best reflects your experience, while incorporating the perspective of other family members who care for your child.

While responding to the following statements, think of all the healthcare workers who have managed your child’s illness or worked with your family **in the last 12 months**. Healthcare workers refer to a broad range of workers in hospital, clinic, or community-based healthcare and social care settings that your child has seen for his/her illness(es) and/or that you have interacted with due to your child’s illness. These can include doctors, nurses, therapists, and other healthcare workers.

For each of the following statements, please **choose the response option that best reflects your experience**.

---

**ITEMS & STEMS**

**Over the past 12 months, we...**

|                                                                                                                                                         | Always                | Usually               | Sometimes             | Seldom                | Never                 |
|---------------------------------------------------------------------------------------------------------------------------------------------------------|-----------------------|-----------------------|-----------------------|-----------------------|-----------------------|
| 1 ...had access to the range of medical expertise needed to manage our child's condition(s).                                                            | <input type="radio"/> | <input type="radio"/> | <input type="radio"/> | <input type="radio"/> | <input type="radio"/> |
| 2 ...had access to sufficient financial support for our child's medical expenses so costs did not stop him/her from receiving recommended medical care. | <input type="radio"/> | <input type="radio"/> | <input type="radio"/> | <input type="radio"/> | <input type="radio"/> |
| 3 ...had a care worker/team that organized our child's care across different care services.                                                             | <input type="radio"/> | <input type="radio"/> | <input type="radio"/> | <input type="radio"/> | <input type="radio"/> |
| 4 ...received consistent information from different healthcare workers.                                                                                 | <input type="radio"/> | <input type="radio"/> | <input type="radio"/> | <input type="radio"/> | <input type="radio"/> |
| 5 ...had access to sufficient financial support for our child's non-medical expenses, for example special needs education and speech therapy, so        | <input type="radio"/> | <input type="radio"/> | <input type="radio"/> | <input type="radio"/> | <input type="radio"/> |

that costs did not stop him/her from receiving recommended non-medical care.

6 ...received appropriate allied health support including physiotherapists, speech therapists and care from other non-doctors or nurses, to meet our goals for our child's development.

**7 In the last 12 months, did your child formally receive any advice or care from a palliative or supportive care team or specialist(s)? [DISPLAY LOGIC: IF NO, 8 NOT DISPLAYED]**

*\*Pediatric Palliative care is specialized medical care for people living with a serious illness. The goal is to improve quality of life for both the child and the family.*

- Yes
- No
- I don't know

**8 Were you introduced to a palliative or supportive care team or specialist(s) at an appropriate time?**

- Too late
- Late
- Neither too late nor too early
- Early
- Too early

**Over the past 12 months, our child's healthcare workers<sup>i</sup>...**

|                                                                                                                           | Always                | Usually               | Sometimes             | Seldom                | Never                 |
|---------------------------------------------------------------------------------------------------------------------------|-----------------------|-----------------------|-----------------------|-----------------------|-----------------------|
| 9... advised us on how to obtain our child's medical equipment(s) and supplies, such as medications, medical consumables. | <input type="radio"/> | <input type="radio"/> | <input type="radio"/> | <input type="radio"/> | <input type="radio"/> |
| 10 ...worked together to ensure our child's medical condition(s) are well managed.                                        | <input type="radio"/> | <input type="radio"/> | <input type="radio"/> | <input type="radio"/> | <input type="radio"/> |
| 11 ...were approachable when we needed advice about our child's care.                                                     | <input type="radio"/> | <input type="radio"/> | <input type="radio"/> | <input type="radio"/> | <input type="radio"/> |
| 12 ...worked together towards common goals for our child's care.                                                          | <input type="radio"/> | <input type="radio"/> | <input type="radio"/> | <input type="radio"/> | <input type="radio"/> |
| 13 ...organized my child's appointments to reduce our hospital visits.                                                    | <input type="radio"/> | <input type="radio"/> | <input type="radio"/> | <input type="radio"/> | <input type="radio"/> |
| 14 ...put in effort to build a trusting relationship with us.                                                             | <input type="radio"/> | <input type="radio"/> | <input type="radio"/> | <input type="radio"/> | <input type="radio"/> |

|                                                                                                                                  |                       |                       |                       |                       |                       |
|----------------------------------------------------------------------------------------------------------------------------------|-----------------------|-----------------------|-----------------------|-----------------------|-----------------------|
| 15 ...kept us well informed about our child's condition.                                                                         | <input type="radio"/> | <input type="radio"/> | <input type="radio"/> | <input type="radio"/> | <input type="radio"/> |
| 16 ...communicated with us in a sensitive way.                                                                                   | <input type="radio"/> | <input type="radio"/> | <input type="radio"/> | <input type="radio"/> | <input type="radio"/> |
| 17 ...gave us enough time to think about decisions for our child's care.                                                         | <input type="radio"/> | <input type="radio"/> | <input type="radio"/> | <input type="radio"/> | <input type="radio"/> |
| 18 ...were responsive in managing our child's medical issues.                                                                    | <input type="radio"/> | <input type="radio"/> | <input type="radio"/> | <input type="radio"/> | <input type="radio"/> |
| 19 ...avoided treatments and investigations that were not aligned with our goals for our child's care.                           | <input type="radio"/> | <input type="radio"/> | <input type="radio"/> | <input type="radio"/> | <input type="radio"/> |
| 20 ...managed our child's physical symptoms to make sure he/she was comfortable.                                                 | <input type="radio"/> | <input type="radio"/> | <input type="radio"/> | <input type="radio"/> | <input type="radio"/> |
| 21 ...ensured our child's wellbeing when he/she was under their care.                                                            | <input type="radio"/> | <input type="radio"/> | <input type="radio"/> | <input type="radio"/> | <input type="radio"/> |
| 22 ...kept us updated about symptoms to look out for so that we knew when our child was unwell.                                  | <input type="radio"/> | <input type="radio"/> | <input type="radio"/> | <input type="radio"/> | <input type="radio"/> |
| 23 ...equipped us with skills so that we could confidently care for our child.                                                   | <input type="radio"/> | <input type="radio"/> | <input type="radio"/> | <input type="radio"/> | <input type="radio"/> |
| 24 ...acknowledged our efforts in caring for our child.                                                                          | <input type="radio"/> | <input type="radio"/> | <input type="radio"/> | <input type="radio"/> | <input type="radio"/> |
| 25 ...listened to us when we spoke up for our child.                                                                             | <input type="radio"/> | <input type="radio"/> | <input type="radio"/> | <input type="radio"/> | <input type="radio"/> |
| 26 ...showed us care and concern.                                                                                                | <input type="radio"/> | <input type="radio"/> | <input type="radio"/> | <input type="radio"/> | <input type="radio"/> |
| 27 ...helped us maintain our hopes for our child.                                                                                | <input type="radio"/> | <input type="radio"/> | <input type="radio"/> | <input type="radio"/> | <input type="radio"/> |
| 28 ...prepared us for what may lie ahead.                                                                                        | <input type="radio"/> | <input type="radio"/> | <input type="radio"/> | <input type="radio"/> | <input type="radio"/> |
| 29 ...provided us with a kind listening ear.                                                                                     | <input type="radio"/> | <input type="radio"/> | <input type="radio"/> | <input type="radio"/> | <input type="radio"/> |
| 30 ...advised us on how to reduce our child's medical expenses e.g. access to subsidies, financing schemes.                      | <input type="radio"/> | <input type="radio"/> | <input type="radio"/> | <input type="radio"/> | <input type="radio"/> |
| 31 ... interacted well with our child.                                                                                           | <input type="radio"/> | <input type="radio"/> | <input type="radio"/> | <input type="radio"/> | <input type="radio"/> |
| 32 ...assessed our child's physical, cognitive and emotional development.                                                        | <input type="radio"/> | <input type="radio"/> | <input type="radio"/> | <input type="radio"/> | <input type="radio"/> |
| 33 ... informed us of the range of available medical options to manage our child's condition(s).                                 | <input type="radio"/> | <input type="radio"/> | <input type="radio"/> | <input type="radio"/> | <input type="radio"/> |
| 34 ... clearly explained the advantages and disadvantages of all options for our child so that we could make informed decisions. | <input type="radio"/> | <input type="radio"/> | <input type="radio"/> | <input type="radio"/> | <input type="radio"/> |

|                                                                                                                                                                                                               |                       |                       |                       |                       |                       |
|---------------------------------------------------------------------------------------------------------------------------------------------------------------------------------------------------------------|-----------------------|-----------------------|-----------------------|-----------------------|-----------------------|
| 35 ... discussed with us how care could be adjusted to improve our child's comfort.                                                                                                                           | <input type="radio"/> | <input type="radio"/> | <input type="radio"/> | <input type="radio"/> | <input type="radio"/> |
| 36 ... involved us as much as we wanted in decision-making about our child's care.                                                                                                                            | <input type="radio"/> | <input type="radio"/> | <input type="radio"/> | <input type="radio"/> | <input type="radio"/> |
| 37 ... considered our preferences for treatments given to our child.                                                                                                                                          | <input type="radio"/> | <input type="radio"/> | <input type="radio"/> | <input type="radio"/> | <input type="radio"/> |
| 38 ...asked us if we wanted to contribute to the community of seriously ill children, for example letting us support other families, sharing our experience with other parents, or participating in research. | <input type="radio"/> | <input type="radio"/> | <input type="radio"/> | <input type="radio"/> | <input type="radio"/> |
| 39 ...treated our child in a kind and respectful way.                                                                                                                                                         | <input type="radio"/> | <input type="radio"/> | <input type="radio"/> | <input type="radio"/> | <input type="radio"/> |

**Over the past 12 months, our child's healthcare workers<sup>(i)</sup>...**

|                                                                                                                                                            | Always                | Usually               | Sometimes             | Seldom                | Never                 | NA                    |
|------------------------------------------------------------------------------------------------------------------------------------------------------------|-----------------------|-----------------------|-----------------------|-----------------------|-----------------------|-----------------------|
| 40 ...were respectful of our spiritual or religious beliefs and practices.                                                                                 | <input type="radio"/> | <input type="radio"/> | <input type="radio"/> | <input type="radio"/> | <input type="radio"/> | <input type="radio"/> |
| 41 ...helped us to access available parent support groups.                                                                                                 | <input type="radio"/> | <input type="radio"/> | <input type="radio"/> | <input type="radio"/> | <input type="radio"/> | <input type="radio"/> |
| 42 ...offered information on specialized transport for our child.                                                                                          | <input type="radio"/> | <input type="radio"/> | <input type="radio"/> | <input type="radio"/> | <input type="radio"/> | <input type="radio"/> |
| 43 ...supported our family's emotional needs related to our child's condition, for example offering us counselling.                                        | <input type="radio"/> | <input type="radio"/> | <input type="radio"/> | <input type="radio"/> | <input type="radio"/> | <input type="radio"/> |
| 44 ...helped us to find someone to take care of our child when we needed help, for example respite care, hospice care.                                     | <input type="radio"/> | <input type="radio"/> | <input type="radio"/> | <input type="radio"/> | <input type="radio"/> | <input type="radio"/> |
| 45 ...provided emotional support to our child, for example music therapy, counselling.                                                                     | <input type="radio"/> | <input type="radio"/> | <input type="radio"/> | <input type="radio"/> | <input type="radio"/> | <input type="radio"/> |
| 46 ... helped our child access special needs school/day-care.                                                                                              | <input type="radio"/> | <input type="radio"/> | <input type="radio"/> | <input type="radio"/> | <input type="radio"/> | <input type="radio"/> |
| 47 ...communicated our child's medical needs in school/day-care to their staff, for example a doctor talked to the school about our child's feeding needs. | <input type="radio"/> | <input type="radio"/> | <input type="radio"/> | <input type="radio"/> | <input type="radio"/> | <input type="radio"/> |
| 48 ...ensured a smooth transition of care for our child across different care settings, for example hospital to home, NICU to CICU.                        | <input type="radio"/> | <input type="radio"/> | <input type="radio"/> | <input type="radio"/> | <input type="radio"/> | <input type="radio"/> |
| 49 ... attended to our child within a reasonable amount of time when we brought him/her to the Emergency Department.                                       | <input type="radio"/> | <input type="radio"/> | <input type="radio"/> | <input type="radio"/> | <input type="radio"/> | <input type="radio"/> |

**Did your child spend at least 1 night in a hospital in the last 12 months? [DISPLAY LOGIC: IF NO, 50-55 NOT DISPLAYED].**

No
