# Supplementary material for: Development of the Parental Experience with Care for Children with Serious Illnesses (PRECIOUS) quality of care measure
Source: PubMed Central journal article supplement (PMC10921687; doi:10.1186/s12904-024-01401-x), 2024-03-08
Supplement: 12904_2024_1401_MOESM5_ESM.pdf [file 12904_2024_1401_MOESM5_ESM.pdf]

| Additional file 5 - PRECIOUS Pilot-testing results at item-level |                                                                                                                                                                                                                                                                                                                        |                |                        |                       |                                             |                       |                        |                           |            |            |             |
|------------------------------------------------------------------|------------------------------------------------------------------------------------------------------------------------------------------------------------------------------------------------------------------------------------------------------------------------------------------------------------------------|----------------|------------------------|-----------------------|---------------------------------------------|-----------------------|------------------------|---------------------------|------------|------------|-------------|
| <i>n</i>                                                         | <i>Indicator</i>                                                                                                                                                                                                                                                                                                       | <i>N valid</i> | <i>% floor (never)</i> | <i>25% percentile</i> | <i>Mean (SD)</i>                            | <i>50% percentile</i> | <i>75% percentile</i>  | <i>% ceiling (Always)</i> | <i>Min</i> | <i>Max</i> | <i>Skew</i> |
| p1                                                               | ...had access to the range of medical expertise needed to manage our child's condition(s).                                                                                                                                                                                                                             | 30             | 0                      | 2                     | 2.67 (0.99)                                 | 3                     | 3                      | 20                        | 1          | 4          | -0.36       |
| p2                                                               | ...had access to sufficient financial support for our child's medical expenses so costs did not stop him/her from receiving recommended medical care.                                                                                                                                                                  | 30             | 6.7                    | 1                     | 2.23 (1.10)                                 | 3                     | 3                      | 6.7                       | 0          | 4          | -0.47       |
| p3                                                               | ...had a care worker/team that organized our child's care across different care services.                                                                                                                                                                                                                              | 30             | 20                     | 1                     | 1.87 (1.31)                                 | 2                     | 3                      | 10                        | 0          | 4          | -0.03       |
| p4                                                               | ...received consistent information from different healthcare workers.                                                                                                                                                                                                                                                  | 30             | 3.3                    | 2                     | 2.4 (0.97)                                  | 2.5                   | 3                      | 10                        | 0          | 4          | -0.41       |
| p5                                                               | ...had access to sufficient financial support for our child's non-medical expenses, such as special needs education or speech therapy, so that costs did not stop him/her from receiving recommended non-medical care.                                                                                                 | 30             | 13.3                   | 1                     | 1.7 (1.09)                                  | 2                     | 3                      | 3.3                       | 0          | 4          | 0.13        |
| p6                                                               | ...received appropriate allied health support including physiotherapists, speech therapists and care from other non-doctors or nurses, to meet our goals for our child's development.                                                                                                                                  | 30             | 3.3                    | 2                     | 2.20 (0.92)                                 | 2                     | 3                      | 6.7                       | 0          | 4          | -0.14       |
|                                                                  |                                                                                                                                                                                                                                                                                                                        |                | <i>Yes</i>             | <i>No</i>             | <i>I Don't Know</i>                         |                       |                        |                           |            |            |             |
| p7                                                               | In the last 12 months, did your child formally receive any advice or care from a palliative* or supportive care team or specialist(s)?<br>*Pediatric Palliative care is specialized medical care for children living with a serious illness. The goal is to improve quality of life for both the child and the family. | 30             | 8                      | 20                    | 2                                           |                       |                        |                           |            |            |             |
|                                                                  |                                                                                                                                                                                                                                                                                                                        |                | <i>% Too late (0)</i>  | <i>% Late (1)</i>     | <i>% Neither too late nor too early (2)</i> | <i>% Early (3)</i>    | <i>% Too early (4)</i> |                           |            |            |             |
| p8                                                               | We were introduced to a palliative or supportive care team or specialist(s) at an appropriate time.                                                                                                                                                                                                                    | 8              | 0                      | 12.5                  | 75                                          | 12.5                  | 0                      |                           |            |            |             |
| p9                                                               | ... advised us on how to obtain our child's medical equipment(s) and supplies, such as medications or medical consumables.                                                                                                                                                                                             | 30             | 0                      | 2                     | 2.63 (0.81)                                 | 3                     | 3                      | 13.3                      | 1          | 4          | -0.04       |

|     |                                                                                                                |    |      |   |             |     |   |      |   |   |       |
|-----|----------------------------------------------------------------------------------------------------------------|----|------|---|-------------|-----|---|------|---|---|-------|
| p10 | ...worked together to ensure our child's medical condition(s) are well managed.                                | 30 | 3.3  | 2 | 2.77 (0.97) | 3   | 3 | 20   | 0 | 4 | -0.90 |
| p11 | ...were approachable when we needed advice about our child's care.                                             | 30 | 0    | 3 | 2.93 (0.74) | 3   | 3 | 20   | 1 | 4 | -0.42 |
| p12 | ...worked together towards common goals for our child's care.                                                  | 30 | 0    | 1 | 2.93 (0.83) | 3   | 3 | 20   | 1 | 4 | -0.99 |
| p13 | ...organized my child's appointments to reduce our hospital visits.                                            | 30 | 13.3 | 1 | 2.13 (1.28) | 2   | 3 | 16.7 | 0 | 4 | -0.15 |
| p14 | ...put in effort to build a trusting relationship with us.                                                     | 30 | 3.3  | 2 | 2.57 (1.14) | 3   | 3 | 23   | 0 | 4 | -0.38 |
| p15 | ...kept us well informed about our child's condition.                                                          | 30 | 3.3  | 2 | 2.6 (1.04)  | 3   | 3 | 20   | 0 | 4 | -0.46 |
| p16 | ...communicated with us in a sensitive way.                                                                    | 30 | 6.7  | 2 | 2.73 (1.14) | 3   | 4 | 26.7 | 0 | 4 | -0.87 |
| p17 | ...gave us enough time to think about decisions for our child's care.                                          | 30 | 0    | 3 | 3.03 (0.72) | 3   | 4 | 26.7 | 2 | 4 | -0.05 |
| p18 | ...were responsive in managing our child's medical issues.                                                     | 30 | 0    | 2 | 2.8 (0.85)  | 3   | 3 | 23.3 | 1 | 4 | 0.04  |
| p19 | ...avoided treatments and investigations that were not aligned with our goals for our child's care.            | 30 | 0    | 2 | 2.87 (0.82) | 3   | 3 | 20   | 1 | 4 | -0.52 |
| p20 | ...managed our child's physical symptoms to make sure he/she was comfortable.                                  | 30 | 0    | 2 | 2.87 (0.73) | 3   | 3 | 20   | 2 | 4 | 0.20  |
| p21 | ...ensured our child's wellbeing when he/she was under their care.                                             | 30 | 0    | 2 | 2.93 (0.78) | 3   | 4 | 26.7 | 2 | 4 | 0.11  |
| p22 | ...kept us updated about symptoms to look out for so that we knew when our child was unwell.                   | 30 | 6.7  | 2 | 2.63 (1.10) | 3   | 3 | 23.3 | 0 | 4 | -0.66 |
| p23 | ...equipped us with skills so that we could confidently care for our child.                                    | 30 | 3.3  | 2 | 2.63 (0.93) | 3   | 3 | 16.7 | 0 | 4 | -0.53 |
| p24 | ...acknowledged our efforts in caring for our child.                                                           | 30 | 0    | 2 | 2.9 (1.44)  | 3   | 4 | 30   | 2 | 4 | 0.19  |
| p25 | ...listened to us when we spoke up for our child.                                                              | 30 | 3.3  | 2 | 2.83 (1.02) | 3   | 4 | 30   | 0 | 4 | -0.65 |
| p26 | ...showed us care and concern.                                                                                 | 30 | 3.3  | 2 | 2.8 (1.03)  | 3   | 4 | 30   | 0 | 4 | -0.55 |
| p27 | ...helped us maintain our hopes for our child.                                                                 | 30 | 3.3  | 2 | 2.47 (1.04) | 3   | 4 | 20   | 0 | 4 | -0.10 |
| p28 | ...prepared us for what may lie ahead.                                                                         | 30 | 6.7  | 2 | 2.43 (1.19) | 2   | 4 | 26.7 | 0 | 4 | -0.15 |
| p29 | ...provided us with a kind listening ear.                                                                      | 30 | 16.7 | 2 | 2.7 (1.12)  | 3   | 4 | 33.3 | 1 | 4 | -0.14 |
| p30 | ...advised us on how to reduce our child's medical expenses, such as access to subsidies or financing schemes. | 30 | 10   | 1 | 1.7 (1.09)  | 1.5 | 2 | 6.7  | 0 | 4 | 0.45  |
| p31 | ... interacted well with our child.                                                                            | 30 | 0    | 2 | 2.6 (1.00)  | 3   | 3 | 20   | 1 | 4 | -0.17 |
| p32 | ...assessed our child's physical, cognitive and emotional development.                                         | 30 | 3.3  | 2 | 2.4 (0.89)  | 2   | 3 | 10   | 0 | 4 | -0.28 |
| p33 | ... informed us of the range of available medical options to manage our child's condition(s).                  | 30 | 0    | 2 | 2.43 (0.94) | 2   | 3 | 13.3 | 1 | 4 | 0.07  |

|     |                                                                                                                                                            |    |      |   |             |   |     |      |   |   |       |
|-----|------------------------------------------------------------------------------------------------------------------------------------------------------------|----|------|---|-------------|---|-----|------|---|---|-------|
| p34 | ... clearly explained the advantages and disadvantages of all options for our child so that we could make informed decisions.                              | 30 | 3.3  | 2 | 2.63 (1.0)  | 3 | 3   | 20   | 0 | 4 | -0.48 |
| p35 | ... discussed with us how care could be adjusted to improve our child's comfort.                                                                           | 30 | 0    | 1 | 2.4 (1.16)  | 2 | 3   | 23.3 | 1 | 4 | 0.11  |
| p36 | ... involved us as much as we wanted in decision-making about our child's care.                                                                            | 30 | 0    | 2 | 2.87 (0.94) | 3 | 4   | 26.7 | 1 | 4 | -0.50 |
| p37 | ... considered our preferences for treatments given to our child.                                                                                          | 30 | 0    | 2 | 2.83 (0.91) | 3 | 4   | 26.7 | 1 | 4 | -0.22 |
| p38 | ...asked us if we wanted to contribute to the community of seriously ill children, such as letting us support other families or participating in research. | 30 | 20   | 1 | 1.73 (1.31) | 2 | 3   | 13.3 | 0 | 4 | 0.32  |
| p39 | ...treated our child in a kind and respectful way.                                                                                                         | 30 | 3.3  | 3 | 3.03 (0.89) | 3 | 4   | 26.7 | 0 | 4 | -1.56 |
| p40 | ...were respectful of our spiritual or religious beliefs and practices.                                                                                    | 23 | 0    | 2 | 2.91 (0.79) | 3 | 3   | 21.7 | 1 | 4 | -0.41 |
| p41 | ...helped us to access available parent support groups.                                                                                                    | 26 | 7.7  | 1 | 1.81 (1.2)  | 3 | 4   | 11.5 | 0 | 4 | 0.52  |
| p42 | ...offered information on specialized transport for our child.                                                                                             | 23 | 34.8 | 0 | 1.3 (1.3)   | 1 | 2   | 4.3  | 0 | 4 | 0.52  |
| p43 | ...supported our family's emotional needs related to our child's condition, for example offering us counselling.                                           | 29 | 13.8 | 1 | 1.76 (1.24) | 3 | 4   | 10.3 | 0 | 4 | 0.35  |
| p44 | ...helped us to find someone to take care of our child when we needed help, such as respite care or hospice care.                                          | 20 | 30   | 0 | 1.5 (1.40)  | 1 | 3   | 10   | 0 | 4 | 0.48  |
| p45 | ...provided emotional support to our child, such as music therapy or counselling.                                                                          | 24 | 33.3 | 0 | 1.08 (1.1)  | 1 | 1.5 | 4.17 | 0 | 4 | 1.04  |
| p46 | ... helped our child access special needs school/day-care.                                                                                                 | 25 | 32   | 0 | 1.68 (1.46) | 2 | 3   | 12   | 0 | 4 | 0.17  |
| p47 | ...communicated our child's medical needs in school/day-care to their staff, such as talking to the school about our child's feeding needs.                | 22 | 22.7 | 1 | 1.77 (1.30) | 2 | 3   | 9.1  | 0 | 4 | 0.01  |
| p48 | ...ensured a smooth transition of care for our child across different care settings, such as hospital to home, NICU to CICU.                               | 19 | 5.3  | 2 | 2.58 (0.90) | 3 | 3   | 10.5 | 0 | 4 | -0.94 |
| p49 | ... attended to our child within a reasonable amount of time when we brought him/her to the Emergency Department.                                          | 26 | 7.7  | 2 | 2.35 (1.06) | 2 | 3   | 11.5 | 0 | 4 | -0.52 |
|     | Did your child spend at least 1 night in a hospital in the last 12 months?                                                                                 | 22 |      |   |             |   |     |      |   |   |       |
| p50 | ...the diet provided suited our child's medical needs.                                                                                                     | 17 | 11.8 | 2 | 2.35 (1.17) | 3 | 3   | 11.8 | 0 | 4 | -0.72 |

|                                                                 |                                                                                                                                          |    |      |   |             |   |     |      |   |   |       |
|-----------------------------------------------------------------|------------------------------------------------------------------------------------------------------------------------------------------|----|------|---|-------------|---|-----|------|---|---|-------|
| p51                                                             | ...we were able to stay close to our child.                                                                                              | 22 | 9.1  | 2 | 3 (0.98)    | 3 | 4   | 36.4 | 1 | 4 | -0.63 |
| p52                                                             | ...Healthcare workers took appropriate action to minimize our child's exposure to infectious diseases.                                   | 22 | 4.5  | 2 | 2.82 (1.05) | 3 | 4   | 27.3 | 0 | 4 | -0.88 |
| p53                                                             | ...we were able to bond with our child, such as taking part in his/her daily care, or in activities together.                            | 22 | 0    | 2 | 3.05 (0.90) | 3 | 4   | 36.4 | 1 | 4 | -0.49 |
| p54                                                             | ...we were given the flexibility to decide who could be at our child's bedside in the Intensive Care Unit, such as replacing caregivers. | 20 | 0    | 3 | 3.05 (0.69) | 3 | 3.5 | 25   | 2 | 4 | -0.06 |
| p55                                                             | ...gave us enough time to train a long-term caregiver to care for our child before discharge.                                            | 13 | 7.7  | 2 | 2.69 (1.11) | 3 | 3   | 23.1 | 0 | 4 | -0.89 |
|                                                                 | Has your child been cared for at home in the last 12 months?                                                                             | 16 |      |   |             |   |     |      |   |   |       |
| p56                                                             | ...provided enough consultations (home visits and/or remote consultations) to support the care of our child.                             | 13 | 15.4 | 1 | 2.31 (1.49) | 2 | 4   | 30.8 | 0 | 4 | -0.24 |
| p57                                                             | ... did their best to help us avoid unnecessary hospitalizations for our child.                                                          | 14 | 0    | 2 | 2.79 (1.19) | 3 | 4   | 35.7 | 1 | 4 | -0.43 |
| 0 – never ; 1 – seldom ; 2 – sometimes ; 3 – often ; 4 - always |                                                                                                                                          |    |      |   |             |   |     |      |   |   |       |
